# Supplementary material for: Fenretinide Improves Intestinal Barrier Function and Mitigates Alcohol Liver Disease
Source: PubMed Central journal article supplement (PMC8012525; doi:10.3389/fphar.2021.630557), 2021-03-18
Supplement: datasheet1.pdf [file datasheet1.pdf]

Supplementary Material

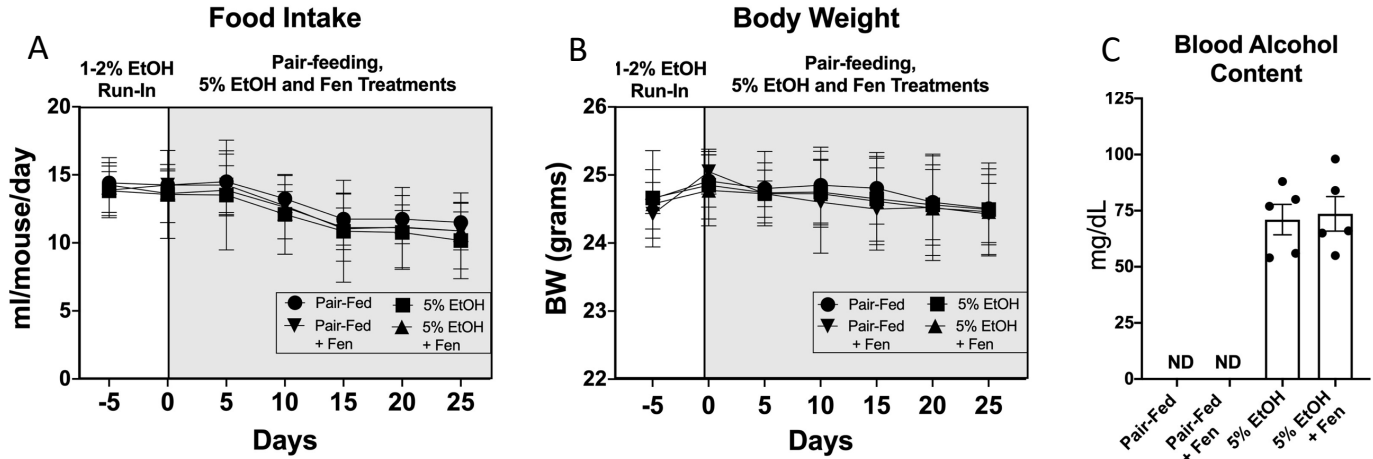

**Supplementary Figure 1.** A) Food intake in pair-fed (no EtOH) and 5% ethanol (EtOH)-fed C57BL/6 mice treated with either vehicle (0.1% DMSO) [pair-fed, EtOH-untreated] or fenretinide (10mg/kg/bw/day) [pair-fed-Fen, EtOH+Fen for 25 days]. B) Body weight of mice described in A). C) Blood alcohol content (BAC) in mice 2 hours after peak blood alcohol content relative to pair-fed mice described in A). All data errors bars represent  $\pm$  SD, with ND=not detected.

Supplementary Material

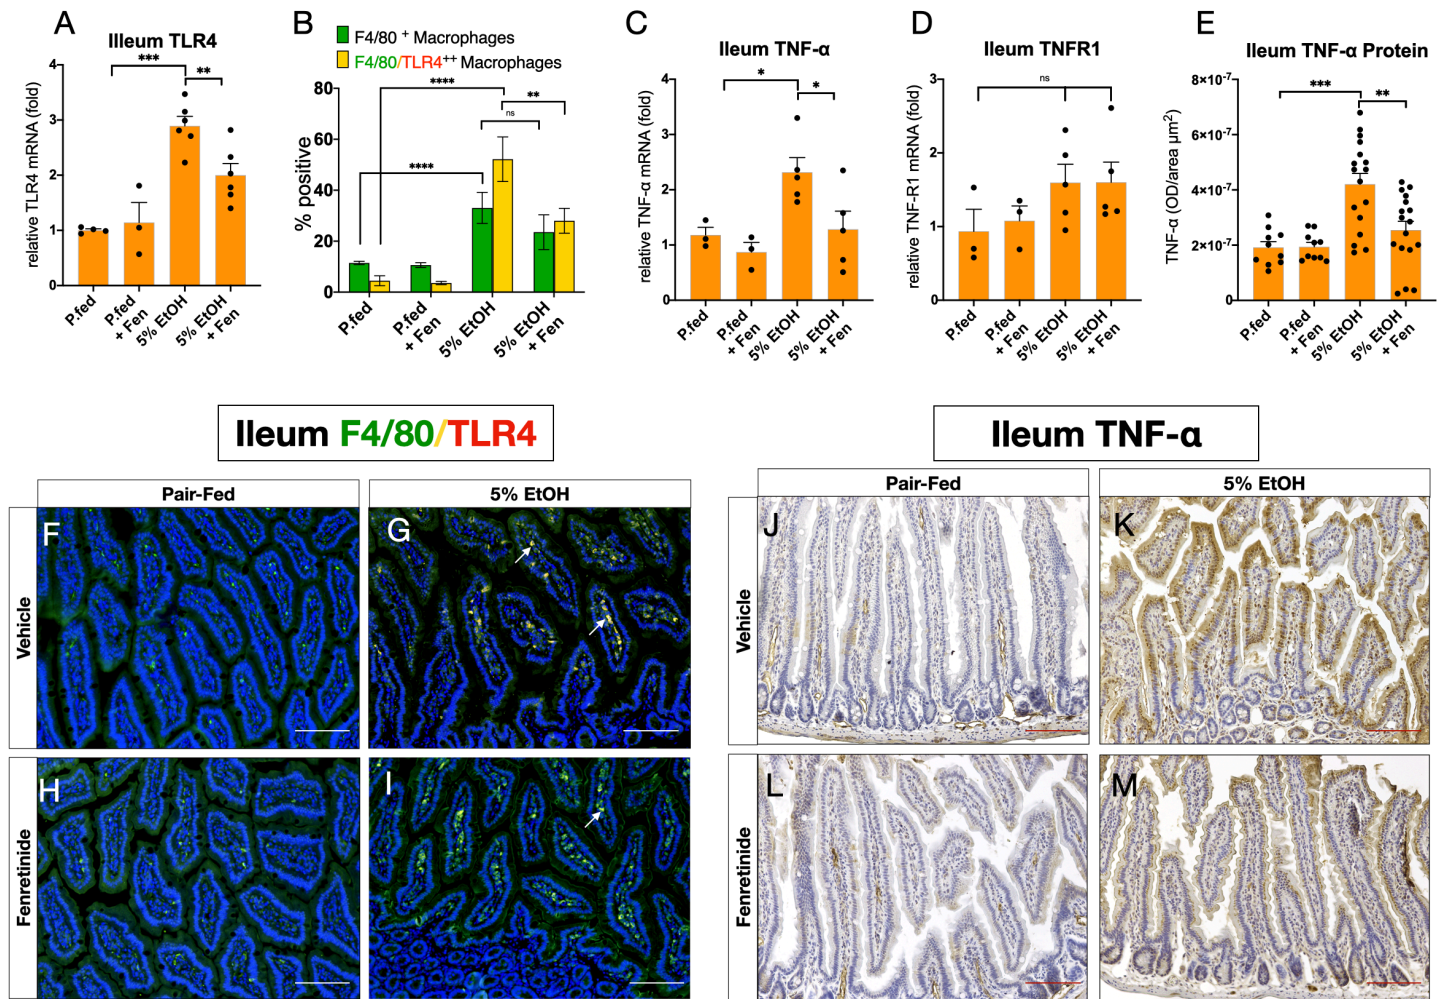

**Supplementary Figure 2.** A) Ileum mRNA levels of *TLR4*, B) Quantification of ileum immunofluorescence (IF) optical density of F4/80 and F4/80:TLR4 double positive macrophages. Ileum mRNA levels of C) *TNF-α*, and D) *tumor necrosis factor receptor 1 (TNFR1)*. E) Quantification of ileum immunohistochemistry (IHC) for TNF-α protein levels. F-I) Representative double immunofluorescence (IF) images of ileum sections stained with antibodies against F4/80 (green channel) and TLR4 (red channel) with double positive cells (yellow/orange [white arrows]) Magnification: 100X; Scale Bar=50 μm. J-M) Representative immunohistochemistry (IHC) images of ileum sections stained with an antibody against tumor necrosis factor α (TNF-α) Magnification: 100X; Scale Bar=50 μm. All data errors bars represent ± SD, with \*p<0.05, \*\*p<0.01, \*\*\*p<0.001, \*\*\*\*p<0.0001, ns=not significant.

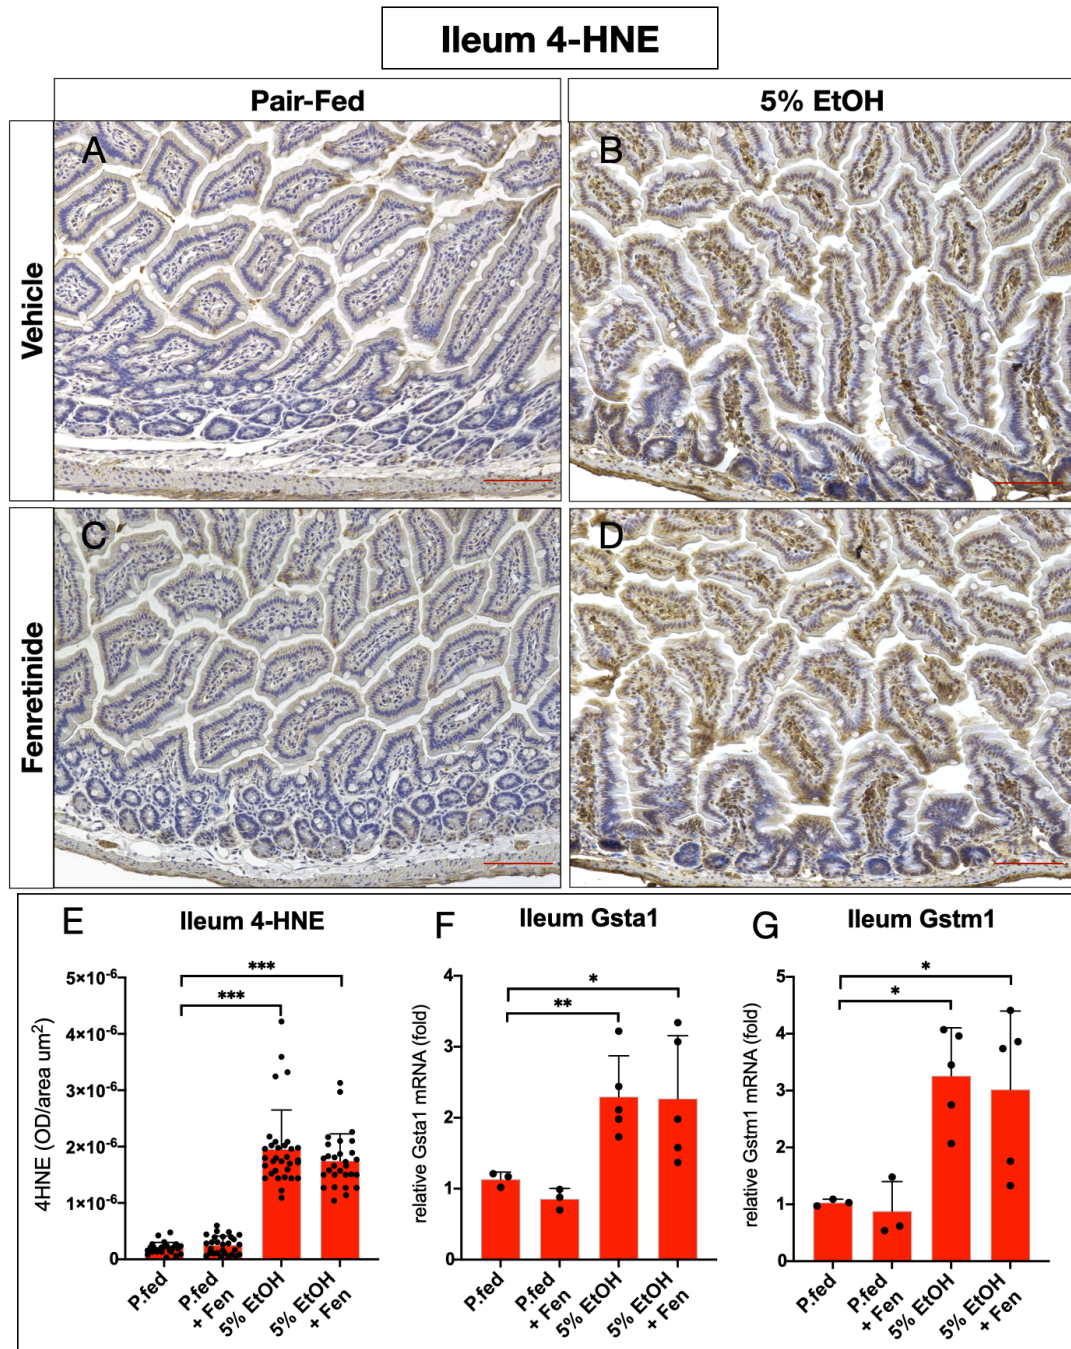

**Supplementary Figure 3.** A-D) Representative immunohistochemistry (IHC) images of ileum sections stained with an antibody against 4 hydroxynonenal (4-HNE) Magnification: 100X; Scale Bar=50  $\mu\text{m}$ . E) Quantification of ileum IHC for 4-HNE protein levels. Ileum mRNA levels of Nrf-2 target genes F) Gsta1, and G) Gstm1. All data errors bars represent  $\pm$  SD, with \* $p < 0.05$ , \*\* $p < 0.01$ , \*\*\* $p < 0.001$ , \*\*\*\* $p < 0.0001$ .

Supplementary Material

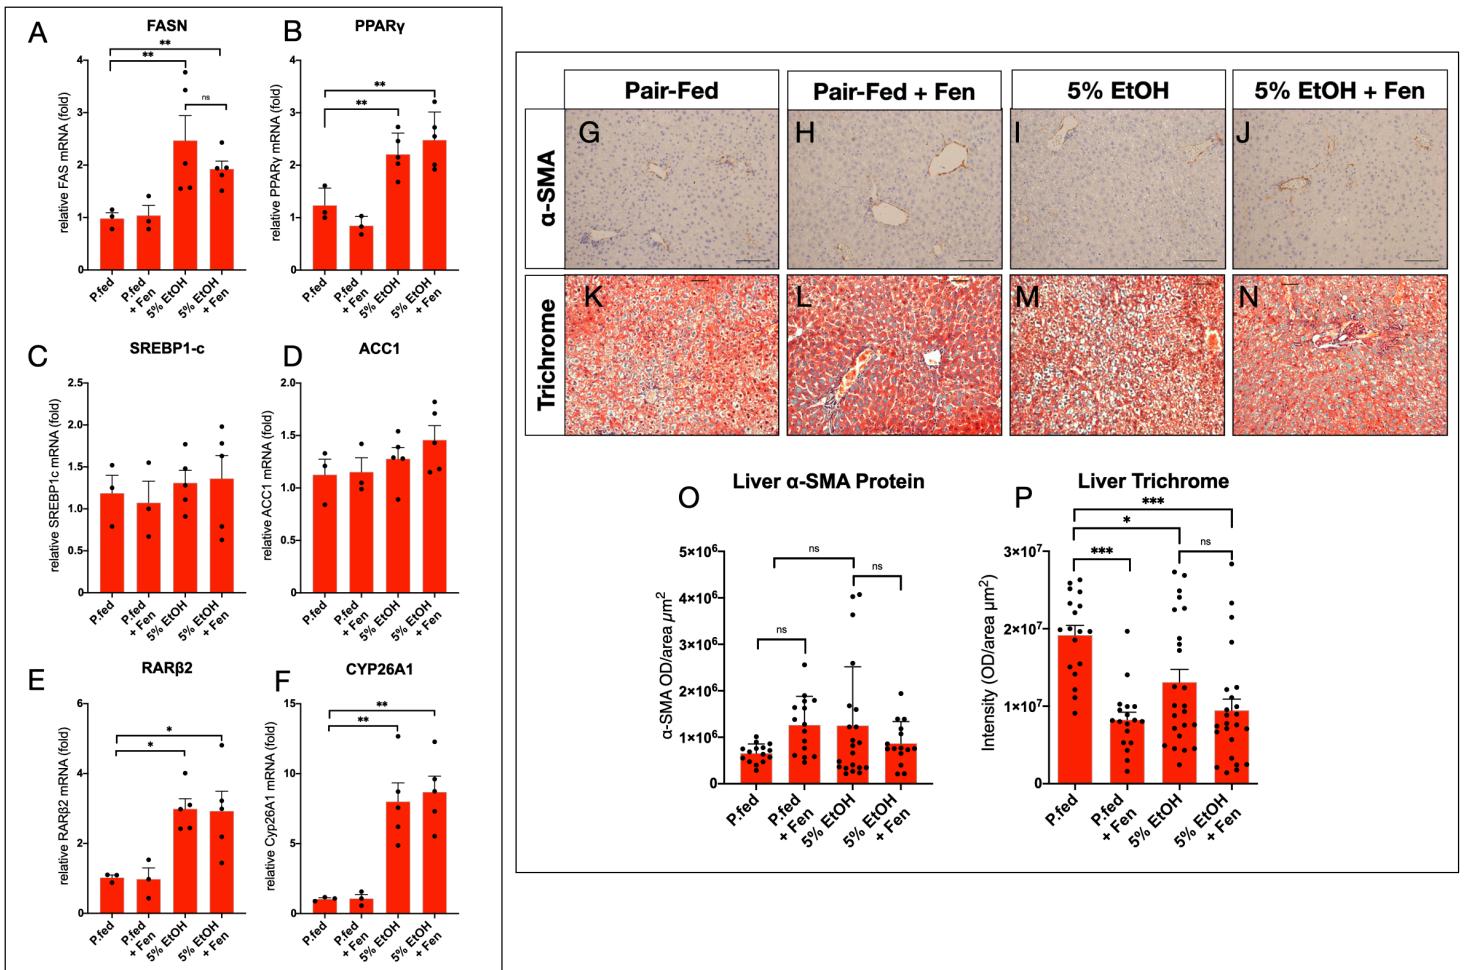

**Supplementary Figure 4.** Hepatic mRNA levels of lipogenic genes A) *FASN*, B) *PPAR-γ*, C) *SREBP1-c*, D) *ACC1* and retinoid target genes, E) *RARβ2*, and F) *Cyp26a1*. G-J) Representative immunohistochemistry (IHC) images of liver sections stained with an antibody against smooth muscle actin  $\alpha$  ( $\alpha$ -SMA) Magnification: 100X; Scale Bar=50  $\mu$ m. K-N) Representative images of liver sections stained with Masson's trichrome for collagen. Magnification: 100X; Scale Bar=50  $\mu$ m. Quantification liver M) IHC for  $\alpha$ -SMA protein levels and N) Masson's trichrome for collagen. All data errors bars represent  $\pm$  SD, with \* $p$ <0.05, \*\* $p$ <0.01, \*\*\* $p$ <0.001, ns=not significant.

Liver F4/80/TLR4

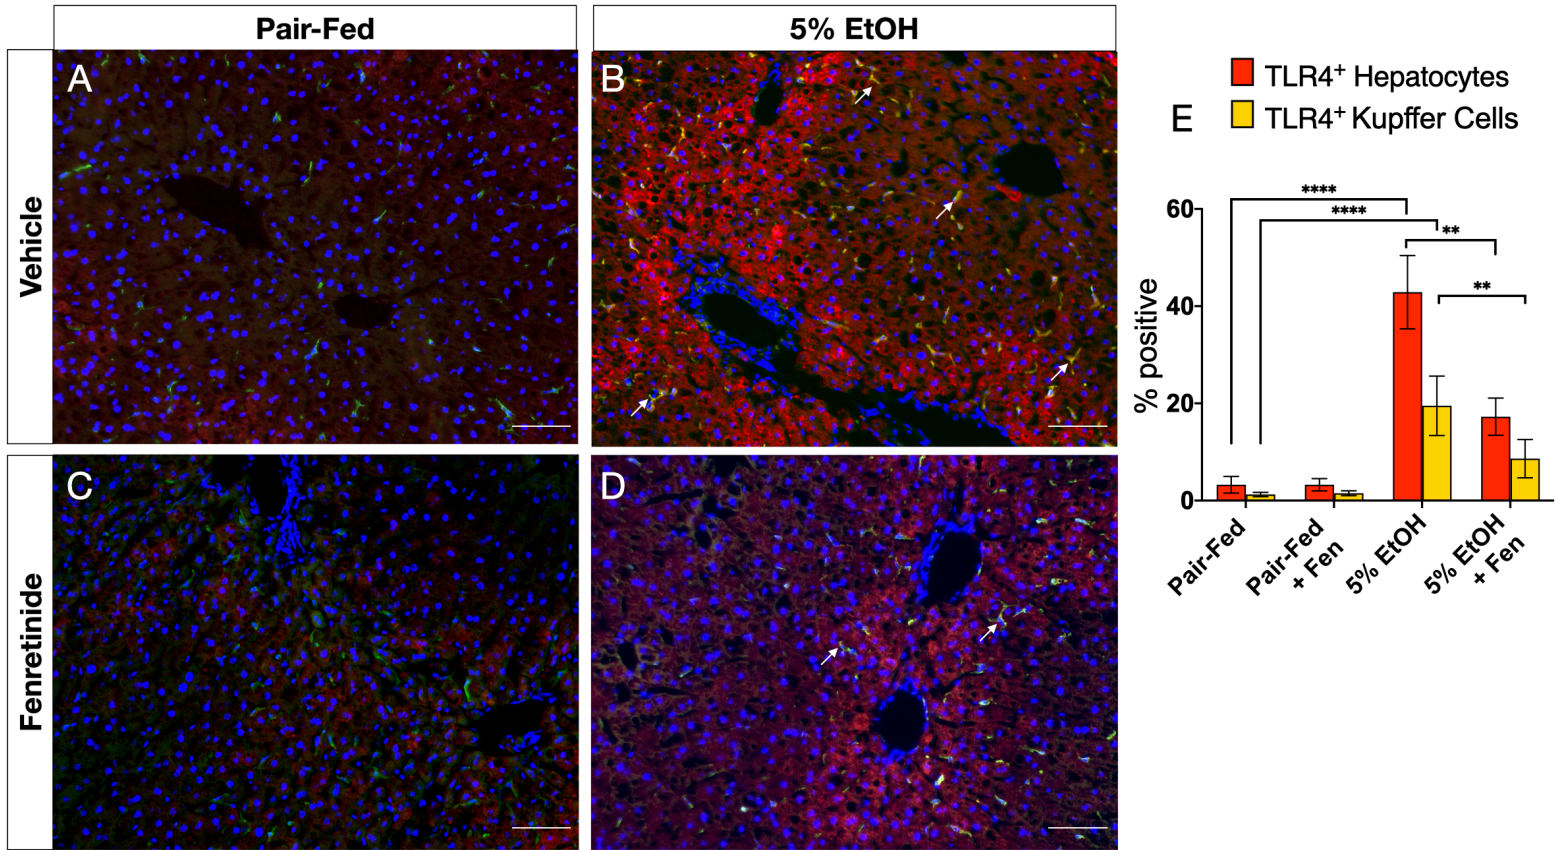

**Supplementary Figure 5.** A-D) Representative double immunofluorescence (IF) images of liver sections stained with antibodies against F4/80 (green channel) and TLR4 (red channel) with double positive cells (yellow/orange [white arrows]) Magnification: 100X; Scale Bar=50  $\mu$ m. Quantification of liver immunofluorescence (IF) optical density of F4/80 and F4/80:TLR4 double positive macrophages. All data errors bars represent  $\pm$  SD, with \*\* $p$ <0.01, \*\*\*\* $p$ <0.0001.

| Gene Name                                                             | Forward Primer (5'-3')   | Reverse Primer (5'-3')  |
|-----------------------------------------------------------------------|--------------------------|-------------------------|
| <b>Pathway: Tight Junction Proteins</b>                               |                          |                         |
| Claudin 1                                                             | TGGGTTTCATCCTGGCTTCT     | TGTATCTGCCCGGTGCTTT     |
| Occludin                                                              | GCAGCCTTCTGCTTCATCG      | CGTCGGGTTCACTCCCATTA    |
| Zona-Occludins 1 (ZO-1)                                               | TCACGATCTCCTGACCAACG     | GGCTGACGGGTAAATCCACA    |
| Cingulin                                                              | AGCAGAGCAGCAAGGAACTT     | GCTGTAGCTCCTTCACCTGG    |
| Fodrin/Spectrin alpha                                                 | CGCATCTTTTTCTCAGCAG      | CCAGGACTTGCTGTCGTCTC    |
| Symplekin                                                             | CGGAGTGTGGCATCACAGTTT    | CGCACTTCAATGGATTTGTCTG  |
| <b>Pathway: Inflammation</b>                                          |                          |                         |
| Interleukin-1 $\beta$ (IL1 $\beta$ )                                  | GAAATGCCACCTTTTGACAGTG   | CTGGATGCTCTCATCAGGACA   |
| Interleukin-6 (IL-6)                                                  | TAGTCCTTCTACCCCAATTTCC   | TTGGTCCTTAGCCACTCCTTC   |
| Toll-like receptor 4 (TLR4)                                           | ATGGCATGGCTTACACCACC     | GAGGCCAATTTTGTCTCCACA   |
| Tumor necrosis factor receptor 1(TNFR1)                               | CCGGGAGAAGAGGGATAGCTT    | TCGGACAGTCACTACCAAGT    |
| Tumor necrosis factor- $\alpha$ (TNF- $\alpha$ )                      | CCTGTAGCCCACGTCGTAG      | GGGAGTAGACAAGGTACAACCC  |
| <b>Pathway: Oxidative Stress</b>                                      |                          |                         |
| Glutathione S-transferase, alpha 1(Gsta1)                             | AGCCCGTGCTTCACTACTTC     | TCTTCAAACCTCCACCCCTGC   |
| Glutathione S-transferase, m1 (Gstm1)                                 | GAGGGCCTCAAGAAGATCTCTG   | TTACTCCAGTGGGCCATCTTTG  |
| <b>Pathway: Retinoid Signaling</b>                                    |                          |                         |
| Retinoic acid receptor $\beta$ (isoform 2) (RAR $\beta$ 2)            | GCGAGAGTTTGATGGAGTTC     | TGGTAGCCCGAGACTTGTCTCCT |
| Cytochrome P450 26A1 (CYP26A1)                                        | GAAACATTGCAGATGGTGCTTCAG | CGGCTGAAGGCCTGCATAATCAC |
| <b>Pathway: Lipid Metabolism</b>                                      |                          |                         |
| Acetyl-Coenzyme A carboxylase alpha (ACC1)                            | ATGGGCGGAATGGTCTCTTTC    | TGGGGACCTTGTCTTCATCAT   |
| Fatty Acid Synthase (FASN)                                            | GGAGGTGGTGATAGCCGGTAT    | TGGGTAATCCATAGAGCCCAG   |
| Peroxisome proliferator-activated receptor $\gamma$ (PPAR $\gamma$ )  | CTCCAAGAATACCAAAGTGCGA   | GCCTGATGCTTTATCCCCACA   |
| Sterol regulatory element binding transcription factor 1-c (SREBP1-c) | CGGAAGCTGTCTGGGGTAG      | GTTGTTGATGAGCTGGAGCA    |
| <b>Pathway: Housekeeping</b>                                          |                          |                         |
| 36B4                                                                  | AGAACAACCCAGCTCTGGAGAAA  | ACACCCTCCAGAAAGCGAGAGT  |
