# Supplementary material for: Fenretinide Improves Intestinal Barrier Function and Mitigates Alcohol Liver Disease
Source: PubMed Central journal article supplement (PMC8012525; doi:10.3389/fphar.2021.630557), 2021-03-18
Supplement: table1.pdf [file table1.pdf]

| Gene Name                                                             | Forward Primer (5'-3')   | Reverse Primer (5'-3')  |
|-----------------------------------------------------------------------|--------------------------|-------------------------|
| <b>Pathway: Tight Junction Proteins</b>                               |                          |                         |
| Claudin 1                                                             | TGGGTTTCATCCTGGCTTCT     | TGTATCTGCCCGGTGCTTT     |
| Occludin                                                              | GCAGCCTTCTGCTTCATCG      | CGTCGGGTTCACTCCCATTA    |
| Zona-Occludins 1 (ZO-1)                                               | TCACGATCTCCTGACCAACG     | GGCTGACGGGTAAATCCACA    |
| Cingulin                                                              | AGCAGAGCAGCAAGGAACTT     | GCTGTAGCTCCTTCACCTGG    |
| Fodrin/Spectrin alpha                                                 | CGCATCTTTTTCTCAGCAG      | CCAGGACTTGCTGTCGTCTC    |
| Symplekin                                                             | CGGAGTGTGGCATCACAGTTT    | CGCACTTCAATGGATTTGTCTG  |
| <b>Pathway: Inflammation</b>                                          |                          |                         |
| Interleukin-1 $\beta$ (IL1 $\beta$ )                                  | GAAATGCCACCTTTTGACAGTG   | CTGGATGCTCTCATCAGGACA   |
| Interleukin-6 (IL-6)                                                  | TAGTCCTTCCTACCCCAATTTCC  | TTGGTCCTTAGCCACTCCTTC   |
| Toll-like receptor 4 (TLR4)                                           | ATGGCATGGCTTACACCACC     | GAGGCCAATTTTGTCTCCACA   |
| Tumor necrosis factor receptor 1(TNFR1)                               | CCGGGAGAAGAGGGATAGCTT    | TCGGACAGTCACTCACCAAGT   |
| Tumor necrosis factor- $\alpha$ (TNF- $\alpha$ )                      | CCTGTAGCCCACGTCGTAG      | GGGAGTAGACAAGGTACAACCC  |
| <b>Pathway: Oxidative Stress</b>                                      |                          |                         |
| Glutathione S-transferase, alpha 1(Gsta1)                             | AGCCCGTGCTTCACTACTTC     | TCTTCAAACCTCCACCCCTGC   |
| Glutathione S-transferase, m1 (Gstm1)                                 | GAGGGCCTCAAGAAGATCTCTG   | TTACTCCAGTGGGCCATCTTTG  |
| <b>Pathway: Retinoid Signaling</b>                                    |                          |                         |
| Retinoic acid receptor $\beta$ (isoform 2) (RAR $\beta$ 2)            | GCGAGAGTTTGATGGAGTTC     | TGGTAGCCCGAGACTTGTCTCCT |
| Cytochrome P450 26A1 (CYP26A1)                                        | GAAACATTGCAGATGGTGCTTCAG | CGGCTGAAGGCCTGCATAATCAC |
| <b>Pathway: Lipid Metabolism</b>                                      |                          |                         |
| Acetyl-Coenzyme A carboxylase alpha (ACC1)                            | ATGGGCGGAATGGTCTCTTTC    | TGGGGACCTTGTCTTCATCAT   |
| Fatty Acid Synthase (FASN)                                            | GGAGGTGGTGATAGCCGGTAT    | TGGGTAATCCATAGAGCCCAG   |
| Peroxisome proliferator-activated receptor $\gamma$ (PPAR $\gamma$ )  | CTCCAAGAATACCAAAGTGCGA   | GCCTGATGCTTTATCCCCACA   |
| Sterol regulatory element binding transcription factor 1-c (SREBP1-c) | CGGAAGCTGTCGGGGTAG       | GTTGTTGATGAGCTGGAGCA    |
| <b>Pathway: Housekeeping</b>                                          |                          |                         |
| 36B4                                                                  | AGAACAACCCAGCTCTGGAGAAA  | ACACCCTCCAGAAAGCGAGAGT  |
| <b>Pathway: Universal Bacterial Primers</b>                           |                          |                         |
| Universal bacterial 16s rRNA (J Clin Microbio 2005, 43:5332-7)        | GTGSTGCAYGGYTGTCGTCA     | ACGTCRTCCMCACCTTCCTC    |
